# Supplementary material
Source: PubMed Central journal article supplement (PMC7724576)
Supplement: 10-1055-s-0040-1714369-s200340.pdf [file 10-1055-s-0040-1714369-s200340.pdf]

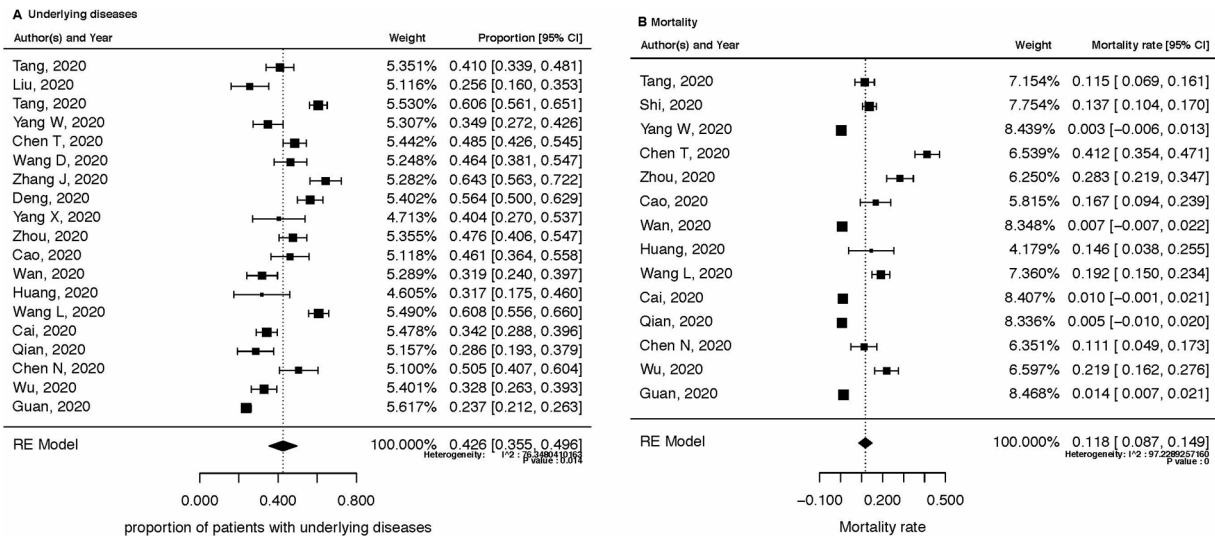

**Supplementary Figure S1** (A) Forest plot of average proportion of COVID-19 patients with underlying disease. (B) Forest plot of average mortality rate of COVID-19 patients. Heterogeneity is defined based on the  $I^2$  index calculated, and random effect models are used to pool the database on the heterogeneity.

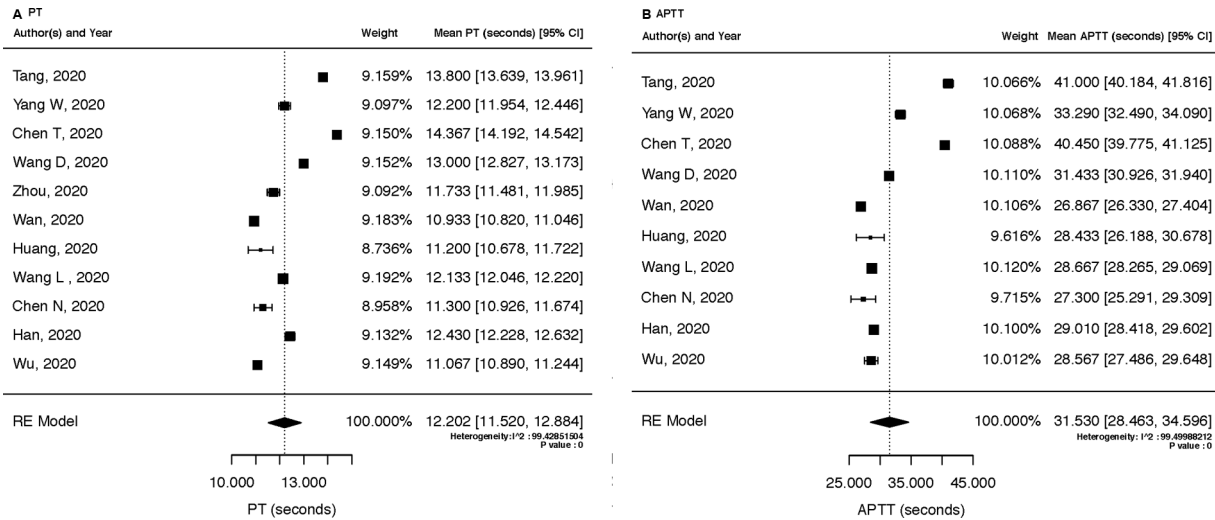

**Supplementary Figure S2** (A) Forest plot of average PT of COVID-19 patients. (B) Forest plot of average APTT of COVID-19 patients. Heterogeneity is defined based on the  $I^2$  index calculated, and random effect models are used to pool the database on the heterogeneity. APTT, activated partial thromboplastin time; PT, prothrombin time.
